# Supplementary material for: Application of Machine Learning Approaches for Classifying Sitting Posture Based on Force and Acceleration Sensors
Source: PubMed Central journal article supplement (PMC5102712; doi:10.1155/2016/5978489), 2016-10-27
Supplement: 5978489.f1.pdf [file 5978489.f1.pdf]

## Supplementary Figures

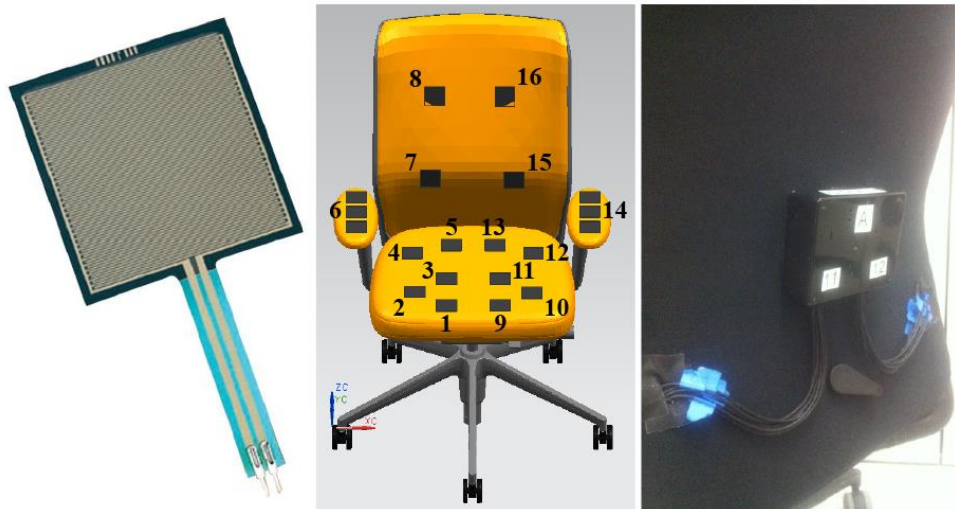

5 Figure A1: **Left:** A pressure sensor (FSR® 406); **middle:** Sensor distribution on the seat pan, on the backrest and on the armrests of the office chair. Sensors were numbered from one to 16; **right:** Box with a Motion-Module (accelerometer, gyroscope and magnetometer) fixed to the backrest of the office chair.

10

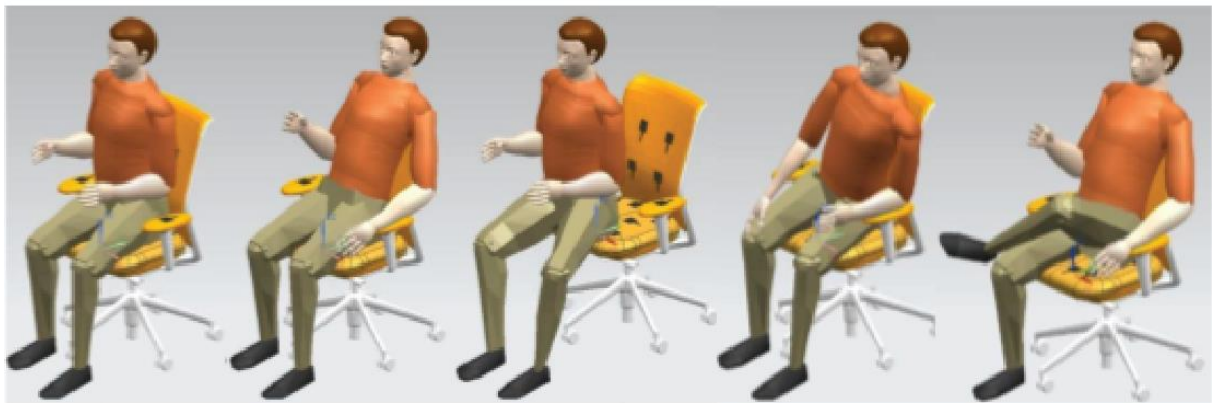

Figure A2: Sitting positions (from left to right): **1** upright, **2** reclined, **3** forward inclined, **4/5** laterally tilted (right/left) and **6/7** crossed legs (left over right/right over left).
